# Supplementary material for: WRKY54 and WRKY70 co-operate as negative regulators of leaf senescence in Arabidopsis thaliana
Source: PubMed Central journal article supplement — J Exp Bot. 2012 Jan 20;63(7):2667–79. doi: 10.1093/jxb/err450 (PMC3346227; doi:10.1093/jxb/err450), 2012-01-20
Supplement: supp_err450_00068320-file001.pdf [file supp_err450_00068320-file001.pdf]

**WRKY54 and WRKY70 co-operate as negative regulators of leaf senescence in *Arabidopsis thaliana*.**

Sébastien Besseau, Jing Li, E. Tapio Palva.

**Supplementary Table S1.** Target genes and primers used for pPCR.

| Gene name | AGI code  | Forward primer                 | Reverse primer                |
|-----------|-----------|--------------------------------|-------------------------------|
| WRKY30    | At5g24110 | 5'-AGAGCGATGATTCCGATCAAG-3'    | 5'-CATCGTCCAGCGTTCTATCAA-3'   |
| WRKY38    | At5g22570 | 5'-CACTTACTTTGGCCACCACAC-3'    | 5'-GGCTTTCCTTCTCCTGATCCT-3'   |
| WRKY41    | At4g11070 | 5'-CAGAATCTCAGGGCCAGTCTT-3'    | 5'-CCGTTGATGGACTCGTAAGTG-3'   |
| WRKY46    | At2g46400 | 5'-GACATGAAACCGACCAAGTCC-3'    | 5'-CAGTTTCGGAATTCTCAACAGCA-3' |
| WRKY53    | At4g23810 | 5'-GCGACAAGACACCAGAGTCAA-3'    | 5'-CGCCGTTGATAGTTCCGTAAT-3'   |
| WRKY54    | At2g40750 | 5'-GCACTGCTCAGAACCATGTCAA-3'   | 5'-CAAGTCCTCACCTGTCTGAAGA-3'  |
| WRKY55    | At2g40740 | 5'-CCAAGAAACAAGTCCAACGCC-3'    | 5'-GCCGCTACCAAACATAACATCAG-3' |
| WRKY62    | At5g01900 | 5'-GCCTACACCAAGGACCAGAAC-3'    | 5'-CGTGCTCTTCGAAGTCAGATG-3'   |
| WRKY63    | At1g66600 | 5'-GACGGTCTCTCGACAACACTGTAA-3' | 5'-GACTCATGGTGTGGTTGACGA-3'   |
| WRKY64    | At1g66560 | 5'-CCTCAACTCGCAACAATTGAC-3'    | 5'-ATGGGTCATCATCCACAGAAA-3'   |
| WRKY66    | At1g80590 | 5'-CAGAGCCACTCATCAACTCCA-3'    | 5'-CGGTGTCTGGAGAATCTTCCAT-3'  |
| WRKY67    | At1g66550 | 5'-CCACTCATCCACACCATTCTC-3'    | 5'-CCGGAATCGTGATTGTAATTC-3'   |
| WRKY70    | At3g56400 | 5'-CATGGATTCCGAAGATCACA-3'     | 5'-CTGGCCACACCAATGACAA-3'     |
| SEN1      | At4g35770 | 5'-GTCATCGGCTATTTCTCCACCT-3'   | 5'-GTTGTCGTTGCTTTCCTCCATC-3'  |
| CAB       | At1g29930 | 5'-CCAGAGGCATTCGCTGAGTTG-3'    | 5'-CCTTACCAGTGACGATGGCTTG-3'  |
| SAG12     | At5g45890 | 5'-TGGATACGGCGAATCTACTAACG-3'  | 5'-GCTTTCATGGCAAGACCACATAG-3' |
| AT4G26410 | AT4G26410 | 5'-GAGCTGAAGTGGCTTCCATGAC-3'   | 5'-GGTCCGACATACCCATGATCC-3'   |
